# Supplementary material
Source: publisher figshare collection journal article supplement (https://acs.figshare.com/ndownloader/files/7440430)
Supplement: Supplementary file 1 [file 7440430]

\*\*\* Supporting Information \*\*\*

**Title:** Extracting metallic nanoparticles from soils for quantitative analysis:  
Method development using engineered silver nanoparticles and SP-ICP-MS

**Authors:** D. M. Schwertfeger,<sup>†</sup> Jessica R. Velicogna,<sup>†</sup> Alexander H. Jesmer,<sup>†</sup> Selin Saatcioglu,<sup>‡</sup>  
Heather McShane,<sup>§</sup> Richard P. Scroggins,<sup>†</sup> Juliska I. Princz<sup>†,\*</sup>

<sup>†</sup> Biological Assessment and Standardization, Environment Canada, Ottawa, Canada

<sup>‡</sup> Department of Civil and Environmental Engineering, Carleton University, Ottawa, Canada

<sup>§</sup> Department of Natural Resource Sciences, McGill University, Montreal, Quebec, Canada

\* To whom correspondence may be addressed ([juliska.princz@canada.ca](mailto:juliska.princz@canada.ca))

**This document contains:**

1. Characterization of the Nanomaterials
2. SP-ICP-MS Analytical Details
3. Experimental details of the Spike-Recovery Analysis

## Characterization of the Nanomaterials

*AgNP (25 nm), nanoComposix.* TEM analysis of the 20 mg L<sup>-1</sup> stock suspension showed that most particles fell within the supplier's size specifications of  $23.1 \pm 6.9$  nm (Fig. S1a). Dynamic light scattering (DLS) analysis of the same 25 nm stock suspension of the particles agreed with the TEM results and showed a mono-modal size distribution with a z-average hydrated diameter of 26.3 nm (0.3 nm standard deviation) with a polydispersity index of 0.11. SP-ICP-MS analysis performed on a diluted suspension (10 to 100 ng L<sup>-1</sup>) revealed that 89% of the total Ag mass consisted of detectable particles (i.e.  $\geq 19$  nm) showing a mono-modal size distribution with mode and mean diameters of 24.8 and 30.4 nm.

*AgNP (40 nm), nanoComposix.* TEM analysis of the 15 g L<sup>-1</sup> stock suspension showed that most particles fell within the supplier's size specifications of  $38.6 \pm 9.8$  nm with a minor presence of particles approximately  $\leq 19$  nm (Fig. S1b). DLS analysis was conducted on a diluted suspension (15 mg L<sup>-1</sup>) and showed a bimodal particle size distribution with 9% of the total light intensity arising from the smaller ( $\sim < 15$  nm) particle size fraction (Fig. S2). Note: z-average particle sizes derived from poly-modal distributions are not accurate. SP-ICP-MS analysis performed on an initial diluted suspension ( $\sim 10$  to 100 ng L<sup>-1</sup>) revealed that 93% of the total Ag mass consisted of detectable particles showing a mono-modal size distribution with mode and mean particle diameters of 35.1 and 43.4 nm (Fig. S3). However, analysis of the suspension 48 h later showed that only 35% of the total Ag mass consisted of detectable particles and mode and mean particle sizes were slightly decreased to 31.2 and 39.8 nm. Presumably, the 65% of the Ag mass comprising the "dissolved" fraction of the SP-ICP-MS analysis consisted not only of dissolved Ag, but of particles below the particle size detection limit of 19 nm. This shift in the particle size distribution and increase of Ag in the dissolved fraction after 48 h was likely because of particle

dissolution. It should be noted that the spiked soil samples used in this study were amended with the original  $15 \text{ g L}^{-1}$  40 nm stock suspension.

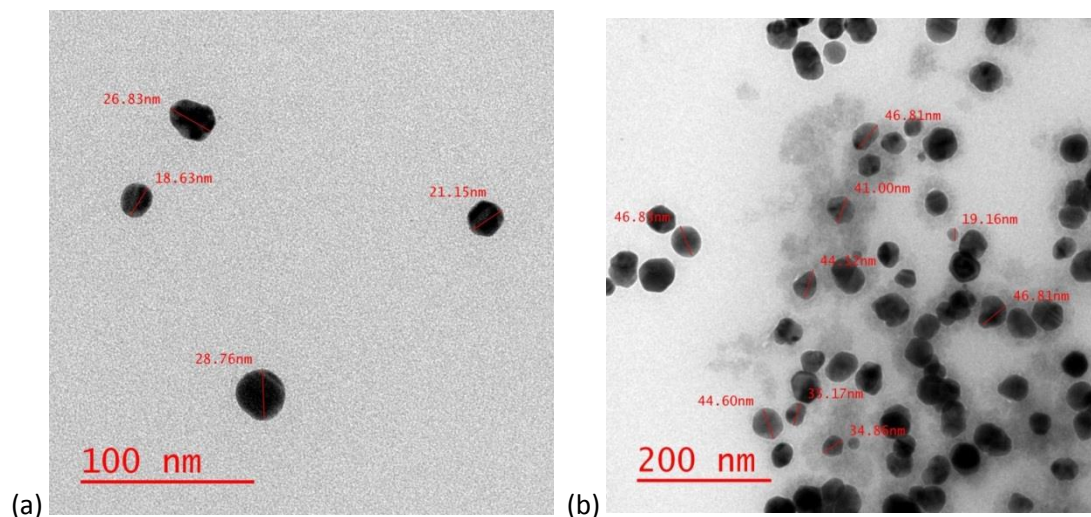

**Figure S1.** TEM images of the 25 nm AgNP prepared from a  $20 \text{ mg L}^{-1}$  aqueous suspension (a), and the 40 nm AgNP prepared from a  $15 \text{ g L}^{-1}$  aqueous suspension (b). Imaging was conducted using an FEI<sup>TM</sup> Tecnai G2 F20 TEM (FEI, Hillsboro OR) at the Carleton University Nano Imaging Facility.

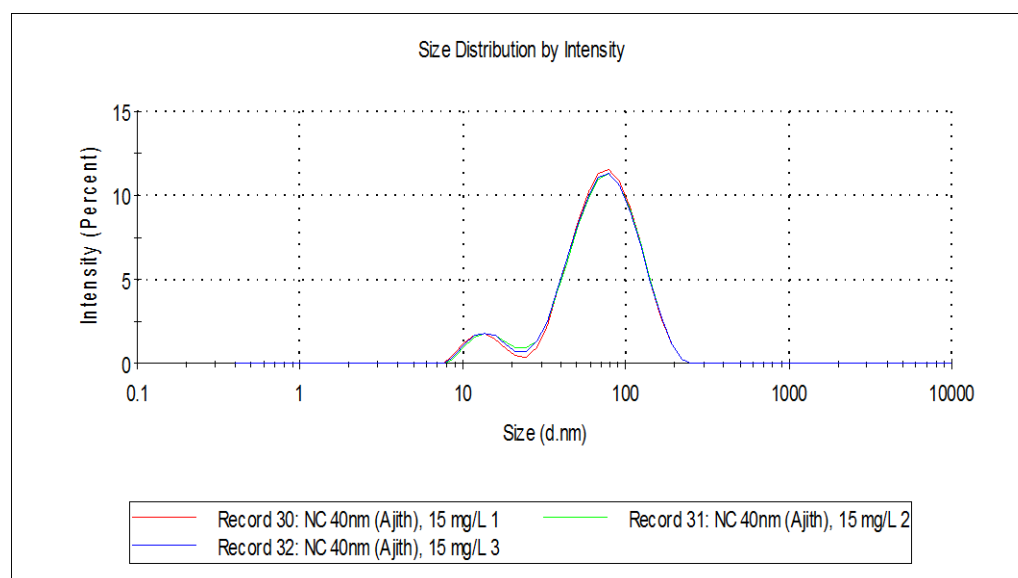

**Figure S2.** Particle size distribution by DLS (based on intensity) of the 40 nm AgNP determined on three replicate samples of a  $15 \text{ mg L}^{-1}$  suspension.

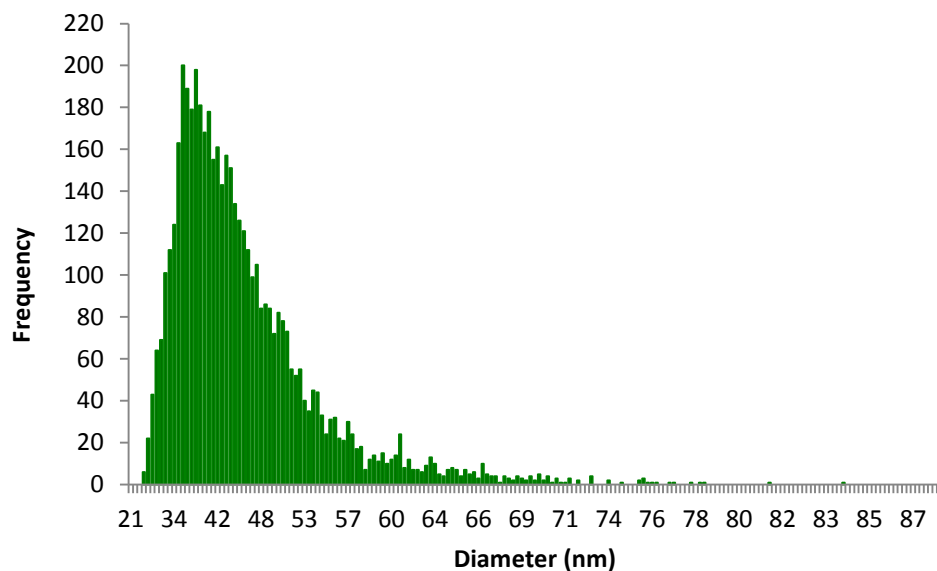

59 (a)

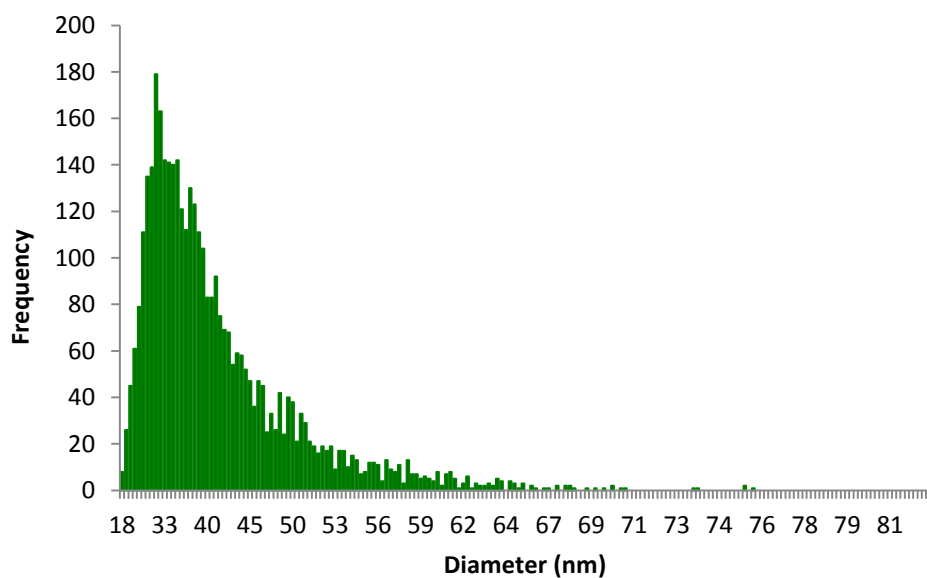

60 (b)

61 **Figure S3.** SP-ICP-MS particle size histograms of the 40 nm AgNP material performed on  
 62 suspensions in the 10 to 100 ng L<sup>-1</sup> range analyzed fresh (a) and analysed after 48 h (b).

## SP-ICP-MS Analytical Details

SP-ICP-MS analysis requires that samples are sufficiently dilute such that analytical coincidence is avoided (i.e., two or more particles making up a plasma event). Based on our operating parameters, we estimated that coincidence could be avoided if sample particle concentrations were  $\leq 1.2 \times 10^5 \text{ mL}^{-1}$ ; therefore target particle concentrations for calibration suspensions and samples were approximately  $10^5 \text{ particles mL}^{-1}$ . Data processing was performed within the Syngistix<sup>TM</sup> Nano-Application module. The software derives the intensity threshold used to discriminate a particle signal from a dissolved signal using an iterative “mean +  $3\sigma$ ” computation, similar to that described by Hadioui et al.<sup>1</sup> As quantification of both the dissolved and nano-particulate forms of Ag are of interest, capturing both dissolved and particle signals is necessary; however, it is doubtful that one dilution/analysis can optimally capture both signals. Therefore samples were analyzed using a dilution series previously described in Schwertfeger et al.<sup>2</sup> Briefly, soil extracts were first diluted to capture the dissolved analyte reading within the dissolved calibration range and above the limit of quantitation (LoQ). A second or “optimal” dilution was used to optimize the particle signal by (i) reducing the dissolved signal to near background levels, (ii) reducing particle counts (i.e.,  $\leq 1.2 \times 10^5 \text{ mL}^{-1}$ ) to minimize coincidence, and (iii) ensuring that the number of particles detected was sufficient for statistical power for describing the particle distributions (generally  $\geq 1000$  particles), which sometimes resulted in our extending the sampling time. Finally, a third dilution was analyzed, (usually 2x the optimal dilution), which was used as a quality control. For example, a 2x dilution should not affect particle intensity, but particle counts should be approximately half, otherwise samples were subsampled again, checked for matrix interferences, and re-analyzed. Each dilution was prepared

such that the ionic strength of the sample matrix was maintained. This was done by using an appropriate dilution of the extracting reagent. Dilutions were analyzed immediately.

## References

- (1) Hadioui, M.; Peyrot, C.; Wilkinson, K. J., Improvements to Single Particle ICPMS by the Online Coupling of Ion Exchange Resins. *Anal. Chem.* **2014**, 86 (10), 4668-4674.
- (2) Schwertfeger, D. M.; Velicogna, J.; Jesmer, A.; Scroggins, R. P.; Princz, J. I., SP-ICP-MS Analysis of Metallic Nanoparticles in Environmental Samples with Large Dissolved Analyte Fractions. *Anal. Chem.* **2016**. DOI: 10.1021/acs.analchem.6b02716

## Spike-Recovery Analysis

**Experimental Set-up.** Ag recovery for the optimal extraction procedure was investigated using a control soil sample to which AgNP was added. Triplicate samples were prepared by adding an aliquot of a 150 mg L<sup>-1</sup> AgNP (40 nm) suspension to 50-mL test tubes containing 0.5 g soil and 50 mL 2.5 mM TSPP to achieve a nominal total Ag concentrations of 1.5 mg L<sup>-1</sup> which corresponded to 150 µg Ag per g soil. The spiked samples were treated as regular samples and followed the finalized method protocol: 30 min mixing, 1.5 min ultrasonication with the wand, 18 h settling, followed by sampling extracts between a depth of 0.5 to 1.0 cm from sample surface and diluting 100x in Nanopure<sup>TM</sup> water within minutes prior to initial SP-ICP-MS analysis. Triplicate AgNP-spiked method blanks were also prepared in the same manner as above, except they did not contain any soil (i.e., TSPP reagent only). The reference sample to which Ag recovery in the spiked samples/blanks was assessed was a 1.5 mg L<sup>-1</sup> AgNP suspension prepared fresh from the 15 g L<sup>-1</sup> stock suspension and analyzed immediately. Recovery was assessed based on three parameters: particle number concentration (particles mL<sup>-1</sup>), particulate Ag mass (µg L<sup>-1</sup>) and total Ag mass (µg L<sup>-1</sup>) (i.e., particulate Ag mass + dissolved Ag mass) obtained by SP-ICP-MS.

**Table S1.** SP-ICP-MS results for the spike-recovery samples. Bracketed values show the standard deviation derived from three replicate samples.

| Sample                  | nominal<br>total Ag<br>conc.<br>$\mu\text{g L}^{-1}$ | measured<br>total Ag conc.<br>$\mu\text{g L}^{-1}$ | particulate<br>Ag mass conc.<br>$\mu\text{g L}^{-1}$ | dissolved<br>Ag mass conc.<br>$\mu\text{g L}^{-1}$ | Particle # conc.<br>particles $\text{mL}^{-1}$ | mean<br>part.<br>size<br>nm |
|-------------------------|------------------------------------------------------|----------------------------------------------------|------------------------------------------------------|----------------------------------------------------|------------------------------------------------|-----------------------------|
| AgNP Ref.<br>suspension | 1500                                                 | 1443 (86)                                          | 1201 (32)                                            | 242 (19)                                           | 2.4E+09 (5E+07)                                | 43.4                        |
| spiked soil<br>sample   | 1500                                                 | 1397 (165)                                         | 1018 (48)                                            | 379 (118)                                          | 2.0E+09 (7E+07)                                | 42.7                        |
| spiked<br>method blank  | 1500                                                 | 1523 (127)                                         | 1218 (38)                                            | 345 (165)                                          | 2.5E+09 (6E+07)                                | 42.8                        |

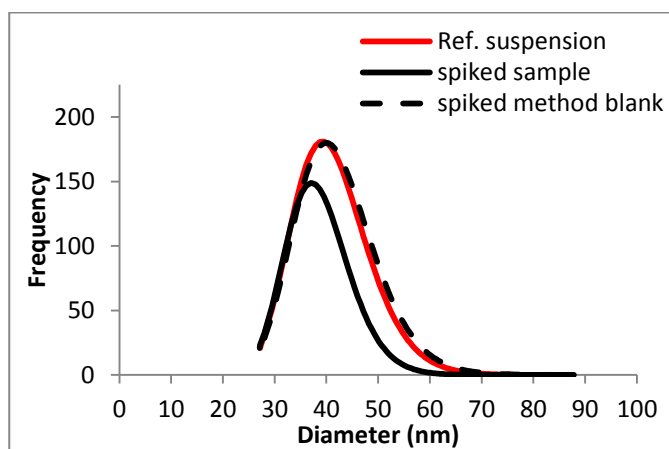

**Fig. S4.** Particle size distributions of Ag particles recovered in spiked samples and spiked method blanks compared to distribution of the reference sample. Note: these distributions represent one of the three replicates samples.
